# Supplementary material for: Chemical Structure of the Lipid A component of Pseudomonas sp. strain PAMC 28618 from Thawing Permafrost in Relation to Pathogenicity
Source: PubMed Central journal article supplement (PMC5438365; doi:10.1038/s41598-017-02145-w), 2017-05-19

## Supplementary Information (SI)

### **Chemical Structure of the Lipid A component of *Pseudomonas* sp. strain PAMC 28618 from Thawing Permafrost in Relation to Pathogenicity**

Han-Gyu Park<sup>1</sup>, Ganesan Sathiyarayanan<sup>2</sup>, Cheol-Hwan Hwang<sup>1</sup>, Da-Hee Ann<sup>1</sup>, Jung-  
Ho Kim<sup>2</sup>, Geul Bang<sup>3</sup>, Kyoung-Soon Jang<sup>3</sup>, Hee Wook Ryu<sup>1</sup>, Yoo Kyung Lee<sup>4,\*</sup>, Yung-  
Hun Yang<sup>2,\*</sup>, Yun-Gon Kim<sup>1,\*</sup>

<sup>1</sup>*Department of Chemical Engineering, Soongsil University, Seoul 06978, Korea*

<sup>2</sup>*Department of Biological Engineering, Konkuk University, Seoul 140-701, Korea*

<sup>3</sup>*Division of Bioconvergence Analysis, Korea Basic Science Institute, Chungbuk 34133,  
Korea*

<sup>4</sup>*Korea Polar Research Institute, Incheon 21990, Korea*

## Supplementary Tables

**Table S1.** The molecular masses of the lipid A from *Pseudomonas sp.* strain PAMC 28618 and its fragmentation from negative ion MALDI-TOF MS

|              | Observed mass <sup>a</sup> (m/z) | Calculated mass <sup>a</sup> (m/z) | Interpretation of peaks <sup>b</sup>                                    |
|--------------|----------------------------------|------------------------------------|-------------------------------------------------------------------------|
| MALDI-TOF MS | 1616.5                           | 1616.0                             | [M – H] <sup>–</sup>                                                    |
|              | 1536.5                           | 1536.0                             | [1616.5 – PO <sub>3</sub> H] <sup>–</sup>                               |
|              | 1446.3                           | 1445.9                             | [1616.5 – C <sub>10</sub> H <sub>18</sub> O <sub>2</sub> ] <sup>–</sup> |
|              | 1418.3                           | 1417.8                             | [1616.5 – C <sub>12</sub> H <sub>22</sub> O <sub>2</sub> ] <sup>–</sup> |
|              | 1366.4                           | 1365.9                             | [1536.5 – C <sub>10</sub> H <sub>18</sub> O <sub>2</sub> ] <sup>–</sup> |

<sup>a</sup> Observed mass and calculated mass are the form of [M-H]<sup>–</sup>

<sup>b</sup> M, intact lipid A.

**Table S2.** Observed peaks in the negative MALDI-QIT TOF spectrum on MS<sup>2</sup> of m/z 1616.27

|                                       | Observed mass (m/z) | Calculated mass (m/z) | Interpretation of peaks                                                                                                                       |
|---------------------------------------|---------------------|-----------------------|-----------------------------------------------------------------------------------------------------------------------------------------------|
| MS/MS of<br>m/z 1616.27<br>parent ion | 1616.27             | 1615.99               | [M – H] <sup>–</sup>                                                                                                                          |
|                                       | 1518.32             | 1518.01               | [1616.27 – PO <sub>4</sub> H <sub>3</sub> ] <sup>–</sup>                                                                                      |
|                                       | 1428.18             | 1427.85               | [1616.27 – C <sub>10</sub> H <sub>20</sub> O <sub>3</sub> ] <sup>–</sup>                                                                      |
|                                       | 1400.16             | 1399.82               | [1616.27 – C <sub>12</sub> H <sub>24</sub> O <sub>3</sub> ] <sup>–</sup>                                                                      |
|                                       | 1348.24             | 1347.88               | [1518.32 – C <sub>10</sub> H <sub>18</sub> O <sub>2</sub> ] <sup>–</sup>                                                                      |
|                                       | 1330.24             | 1329.87               | [1518.32 – C <sub>10</sub> H <sub>20</sub> O <sub>3</sub> ] <sup>–</sup>                                                                      |
|                                       | 1212.07             | 1211.67               | [1428.18 – C <sub>12</sub> H <sub>24</sub> O <sub>3</sub> ] <sup>–</sup>                                                                      |
|                                       | 1178.14             | 1177.75               | [1348.24 – C <sub>10</sub> H <sub>18</sub> O <sub>2</sub> ] <sup>–</sup>                                                                      |
|                                       | 1132.11             | 1131.71               | [1400.16 – C <sub>10</sub> H <sub>18</sub> O <sub>2</sub> – PO <sub>4</sub> H <sub>3</sub> ] <sup>–</sup>                                     |
|                                       | 1114.10             | 1113.70               | [1212.07 – PO <sub>4</sub> H <sub>3</sub> ] <sup>–</sup>                                                                                      |
|                                       | 850.95              | 851.56                | [1330.24 – C <sub>12</sub> H <sub>22</sub> O – C <sub>12</sub> H <sub>22</sub> O <sub>2</sub> – PO <sub>4</sub> H <sub>3</sub> ] <sup>–</sup> |
|                                       | 824.95              | 824.49                | [M – C <sub>40</sub> H <sub>74</sub> NO <sub>12</sub> P – H] <sup>–</sup>                                                                     |

**Table S3.** Observed peaks in the negative MALDI-QIT TOF spectrum on MS<sup>3</sup> of m/z 1518.32

|                                                 | Observed mass (m/z) | Calculated mass (m/z) | Interpretation of peaks                                                                                                   |
|-------------------------------------------------|---------------------|-----------------------|---------------------------------------------------------------------------------------------------------------------------|
| MS <sup>3</sup> of<br>m/z 1518.32<br>parent ion | 1348.23             | 1347.88               | [1518.32 - C <sub>10</sub> H <sub>18</sub> O <sub>2</sub> ] <sup>-</sup>                                                  |
|                                                 | 1330.23             | 1329.87               | [1518.32 - C <sub>10</sub> H <sub>20</sub> O <sub>3</sub> ] <sup>-</sup>                                                  |
|                                                 | 1318.22             | 1317.83               | [1518.32 - C <sub>12</sub> H <sub>24</sub> O <sub>2</sub> ] <sup>-</sup>                                                  |
|                                                 | 1302.20             | 1301.84               | [1518.32 - C <sub>12</sub> H <sub>24</sub> O <sub>3</sub> ] <sup>-</sup>                                                  |
|                                                 | 1178.14             | 1177.75               | [1348.23 - C <sub>10</sub> H <sub>18</sub> O <sub>2</sub> ] <sup>-</sup>                                                  |
|                                                 | 1132.13             | 1131.71               | [1302.20 - C <sub>10</sub> H <sub>18</sub> O <sub>2</sub> ] <sup>-</sup>                                                  |
|                                                 | 1114.10             | 1113.70               | [1302.20 - C <sub>10</sub> H <sub>20</sub> O <sub>3</sub> ] <sup>-</sup>                                                  |
|                                                 | 962.02              | 961.58                | [1330.23 - C <sub>10</sub> H <sub>18</sub> O <sub>2</sub> - C <sub>12</sub> H <sub>22</sub> O <sub>2</sub> ] <sup>-</sup> |

**Table S4.** Observed peaks in the negative MALDI-QIT TOF spectrum on MS<sup>4</sup> of m/z 1348.16

|                                           | Observed peaks (m/z) | Calculated peaks (m/z) | Interpretation of peaks                                                  |
|-------------------------------------------|----------------------|------------------------|--------------------------------------------------------------------------|
| MS <sup>4</sup> of m/z 1348.16 parent ion | 1178.08              | 1177.75                | [1348.16 – C <sub>10</sub> H <sub>18</sub> O <sub>2</sub> ] <sup>-</sup> |
|                                           | 1160.08              | 1159.74                | [1348.16 – C <sub>10</sub> H <sub>20</sub> O <sub>3</sub> ] <sup>-</sup> |
|                                           | 1132.07              | 1131.71                | [1348.16 – C <sub>12</sub> H <sub>24</sub> O <sub>3</sub> ] <sup>-</sup> |
|                                           | 961.94               | 961.58                 | [1160.08 – C <sub>12</sub> H <sub>22</sub> O <sub>2</sub> ] <sup>-</sup> |
|                                           | 943.96               | 943.57                 | [1160.08 – C <sub>12</sub> H <sub>24</sub> O <sub>3</sub> ] <sup>-</sup> |

**Table S5.** Observed peaks in the negative MALDI-QIT TOF spectrum on MS<sup>5</sup> of m/z 1132.08

|                                           | Observed peaks (m/z) | Calculated peaks (m/z) | Interpretation of peaks                                                  |
|-------------------------------------------|----------------------|------------------------|--------------------------------------------------------------------------|
| MS <sup>5</sup> of m/z 1132.08 parent ion | 962.01               | 961.58                 | [1132.08 - C <sub>10</sub> H <sub>18</sub> O <sub>2</sub> ] <sup>-</sup> |
|                                           | 943.96               | 943.57                 | [1132.08 - C <sub>10</sub> H <sub>20</sub> O <sub>3</sub> ] <sup>-</sup> |
|                                           | 931.97               | 931.53                 | [1132.08 - C <sub>12</sub> H <sub>24</sub> O <sub>2</sub> ] <sup>-</sup> |

**Table S6.** Observed peaks in the negative MALDI-QIT-TOF spectrum on MS<sup>3</sup> of m/z 1428.19

|                                           | Observed peaks (m/z) | Calculated peaks (m/z) | Interpretation of peaks                                                                    |
|-------------------------------------------|----------------------|------------------------|--------------------------------------------------------------------------------------------|
| MS <sup>3</sup> of m/z 1428.19 parent ion | 1330.24              | 1329.87                | [1428.19 – PO <sub>4</sub> H <sub>3</sub> ] <sup>-</sup>                                   |
|                                           | 1212.07              | 1211.67                | [1428.19 – C <sub>12</sub> H <sub>24</sub> O <sub>3</sub> ] <sup>-</sup>                   |
|                                           | 1178.15              | 1177.75                | [1428.19 – C <sub>10</sub> H <sub>18</sub> O <sub>2</sub> -PO <sub>3</sub> H] <sup>-</sup> |
|                                           | 1132.08              | 1131.71                | [1330.24 – C <sub>12</sub> H <sub>22</sub> O <sub>2</sub> ] <sup>-</sup>                   |
|                                           | 1114.12              | 1113.70                | [1212.07 – PO <sub>4</sub> H <sub>3</sub> ] <sup>-</sup>                                   |
|                                           | 1016.11              | 1015.72                | [1114.12 – PO <sub>4</sub> H <sub>3</sub> ] <sup>-</sup>                                   |
|                                           | 930.94               | 931.53                 | [1132.08 – C <sub>12</sub> H <sub>24</sub> O <sub>2</sub> ] <sup>-</sup>                   |
|                                           | 850.96               | 851.56                 | [930.94 – PO <sub>3</sub> H] <sup>-</sup>                                                  |
|                                           | 808.96               | 808.50                 | [1428.19 – C <sub>30</sub> H <sub>54</sub> NO <sub>10</sub> P] <sup>-</sup>                |

**Table S7.** Observed peaks in the negative MALDI-QIT-TOF spectrum on MS<sup>4</sup> of m/z 1330.24

|                                           | Observed peaks (m/z) | Calculated peaks (m/z) | Interpretation of peaks                                                                    |
|-------------------------------------------|----------------------|------------------------|--------------------------------------------------------------------------------------------|
| MS <sup>4</sup> of m/z 1330.24 parent ion | 1160.17              | 1159.74                | [1330.24 - C <sub>10</sub> H <sub>18</sub> O <sub>2</sub> ] <sup>-</sup>                   |
|                                           | 1130.12              | 1129.69                | [1330.24 - C <sub>12</sub> H <sub>24</sub> O <sub>2</sub> ] <sup>-</sup>                   |
|                                           | 1114.11              | 1113.70                | [1330.24 - C <sub>12</sub> H <sub>24</sub> O <sub>3</sub> ] <sup>-</sup>                   |
|                                           | 1052.12              | 1051.74                | [1330.24 - C <sub>12</sub> H <sub>22</sub> O <sub>2</sub> -PO <sub>3</sub> H] <sup>-</sup> |
|                                           | 962.01               | 961.58                 | [1160.17 - C <sub>12</sub> H <sub>22</sub> O <sub>2</sub> ] <sup>-</sup>                   |



**Table S8.** Observed peaks in the negative MALDI-QIT-TOF spectrum on MS<sup>5</sup> of m/z 1114.13

|                                           | Observed peaks (m/z) | Calculated peaks (m/z) | Interpretation of peaks                                                  |
|-------------------------------------------|----------------------|------------------------|--------------------------------------------------------------------------|
| MS <sup>5</sup> of m/z 1114.13 parent ion | 1016.19              | 1015.72                | [1114.13 - PO <sub>4</sub> H <sub>3</sub> ] <sup>-</sup>                 |
|                                           | 944.03               | 943.57                 | [1114.13 - C <sub>10</sub> H <sub>18</sub> O <sub>2</sub> ] <sup>-</sup> |
|                                           | 926.02               | 925.56                 | [1114.13 - C <sub>10</sub> H <sub>20</sub> O <sub>3</sub> ] <sup>-</sup> |
|                                           | 913.97               | 913.52                 | [1114.13 - C <sub>12</sub> H <sub>24</sub> O <sub>2</sub> ] <sup>-</sup> |

**Table S9.** The molecular masses of the lipid A from *Pseudomonas cichorii* and its fragmentation from negative ion MALDI-TOF MS

|              | Observed peaks (m/z) | Calculated peaks (m/z) | Interpretation of peaks                                                 |
|--------------|----------------------|------------------------|-------------------------------------------------------------------------|
| MALDI-TOF MS | 1616.2               | 1616.0                 | [M - H] <sup>-</sup>                                                    |
|              | 1536.2               | 1536.0                 | [1616.2 - PO <sub>3</sub> H] <sup>-</sup>                               |
|              | 1446.0               | 1445.9                 | [1616.2 - C <sub>10</sub> H <sub>18</sub> O <sub>2</sub> ] <sup>-</sup> |
|              | 1418.0               | 1417.8                 | [1616.2 - C <sub>12</sub> H <sub>22</sub> O <sub>2</sub> ] <sup>-</sup> |
|              | 1366.1               | 1365.9                 | [1536.2 - C <sub>10</sub> H <sub>18</sub> O <sub>2</sub> ] <sup>-</sup> |

**Table S10.** Observed peaks in the negative MALDI-QIT-TOF spectrum on MS<sup>2</sup> of m/z 1616.10

|                                 | Observed peaks (m/z) | Calculated peaks (m/z) | Interpretation of peaks                                                                                                                       |
|---------------------------------|----------------------|------------------------|-----------------------------------------------------------------------------------------------------------------------------------------------|
| MS/MS of m/z 1616.10 parent ion | 1616.10              | 1615.99                | [M – H] <sup>-</sup>                                                                                                                          |
|                                 | 1518.19              | 1518.01                | [1616.10 – PO <sub>4</sub> H <sub>3</sub> ] <sup>-</sup>                                                                                      |
|                                 | 1428.07              | 1427.85                | [1616.10 – C <sub>10</sub> H <sub>20</sub> O <sub>3</sub> ] <sup>-</sup>                                                                      |
|                                 | 1400.01              | 1399.82                | [1616.10 – C <sub>12</sub> H <sub>24</sub> O <sub>3</sub> ] <sup>-</sup>                                                                      |
|                                 | 1348.15              | 1347.88                | [1518.19 – C <sub>10</sub> H <sub>18</sub> O <sub>2</sub> ] <sup>-</sup>                                                                      |
|                                 | 1330.15              | 1329.87                | [1518.19 – C <sub>10</sub> H <sub>20</sub> O <sub>3</sub> ] <sup>-</sup>                                                                      |
|                                 | 1212.00              | 1211.67                | [1428.07 – C <sub>12</sub> H <sub>24</sub> O <sub>3</sub> ] <sup>-</sup>                                                                      |
|                                 | 1178.00              | 1177.75                | [1348.15 – C <sub>10</sub> H <sub>18</sub> O <sub>2</sub> ] <sup>-</sup>                                                                      |
|                                 | 1132.06              | 1131.71                | [1400.01 – C <sub>10</sub> H <sub>18</sub> O <sub>2</sub> – PO <sub>4</sub> H <sub>3</sub> ] <sup>-</sup>                                     |
|                                 | 1114.06              | 1113.70                | [1212.00 – PO <sub>4</sub> H <sub>3</sub> ] <sup>-</sup>                                                                                      |
|                                 | 850.94               | 851.56                 | [1330.15 – C <sub>12</sub> H <sub>22</sub> O – C <sub>12</sub> H <sub>22</sub> O <sub>2</sub> – PO <sub>4</sub> H <sub>3</sub> ] <sup>-</sup> |
|                                 | 824.94               | 824.49                 | [M – C <sub>40</sub> H <sub>74</sub> NO <sub>12</sub> P – H] <sup>-</sup>                                                                     |

**Table S11.** Observed peaks in the negative MALDI-QIT-TOF spectrum on MS<sup>3</sup> of m/z 1518.19

|                                           | Observed peaks (m/z) | Calculated peaks (m/z) | Interpretation of peaks                                                                                                  |
|-------------------------------------------|----------------------|------------------------|--------------------------------------------------------------------------------------------------------------------------|
| MS <sup>3</sup> of m/z 1518.19 parent ion | 1348.15              | 1347.88                | [1518.19 – C <sub>10</sub> H <sub>18</sub> O <sub>2</sub> ] <sup>-</sup>                                                 |
|                                           | 1330.14              | 1329.87                | [1518.19 – C <sub>10</sub> H <sub>20</sub> O <sub>3</sub> ] <sup>-</sup>                                                 |
|                                           | 1302.12              | 1301.84                | [1518.19 – C <sub>12</sub> H <sub>24</sub> O <sub>2</sub> ] <sup>-</sup>                                                 |
|                                           | 1178.09              | 1177.75                | [1518.19 – C <sub>12</sub> H <sub>24</sub> O <sub>3</sub> ] <sup>-</sup>                                                 |
|                                           | 1132.07              | 1131.71                | [1348.15 – C <sub>10</sub> H <sub>18</sub> O <sub>2</sub> ] <sup>-</sup>                                                 |
|                                           | 1114.07              | 1113.70                | [1302.12 – C <sub>10</sub> H <sub>18</sub> O <sub>2</sub> ] <sup>-</sup>                                                 |
|                                           | 961.98               | 961.58                 | [1302.12 – C <sub>10</sub> H <sub>20</sub> O <sub>3</sub> ] <sup>-</sup>                                                 |
|                                           | 944.04               | 943.57                 | [1330.14 – C <sub>10</sub> H <sub>18</sub> O <sub>2</sub> -C <sub>12</sub> H <sub>22</sub> O <sub>2</sub> ] <sup>-</sup> |

**Table S12.** Observed peaks in the negative MALDI-QIT-TOF spectrum on MS<sup>4</sup> of m/z 1348.15

|                                           | Observed peaks (m/z) | Calculated peaks (m/z) | Interpretation of peaks                                                  |
|-------------------------------------------|----------------------|------------------------|--------------------------------------------------------------------------|
| MS <sup>4</sup> of m/z 1348.15 parent ion | 1178.07              | 1177.75                | [1348.15 - C <sub>10</sub> H <sub>18</sub> O <sub>2</sub> ] <sup>-</sup> |
|                                           | 1160.06              | 1159.74                | [1348.15 - C <sub>10</sub> H <sub>20</sub> O <sub>3</sub> ] <sup>-</sup> |
|                                           | 1132.06              | 1131.71                | [1348.15 - C <sub>12</sub> H <sub>24</sub> O <sub>3</sub> ] <sup>-</sup> |
|                                           | 962.00               | 961.58                 | [1160.06 - C <sub>12</sub> H <sub>22</sub> O <sub>2</sub> ] <sup>-</sup> |
|                                           | 944.02               | 943.57                 | [1160.06 - C <sub>12</sub> H <sub>24</sub> O <sub>3</sub> ] <sup>-</sup> |

## Supplementary figures

**Fig. S1.** Location of Midtre Lovenbreen close to Ny-Alesund, in Svalbard, Norway and exact sampling sites marked in red color circles.

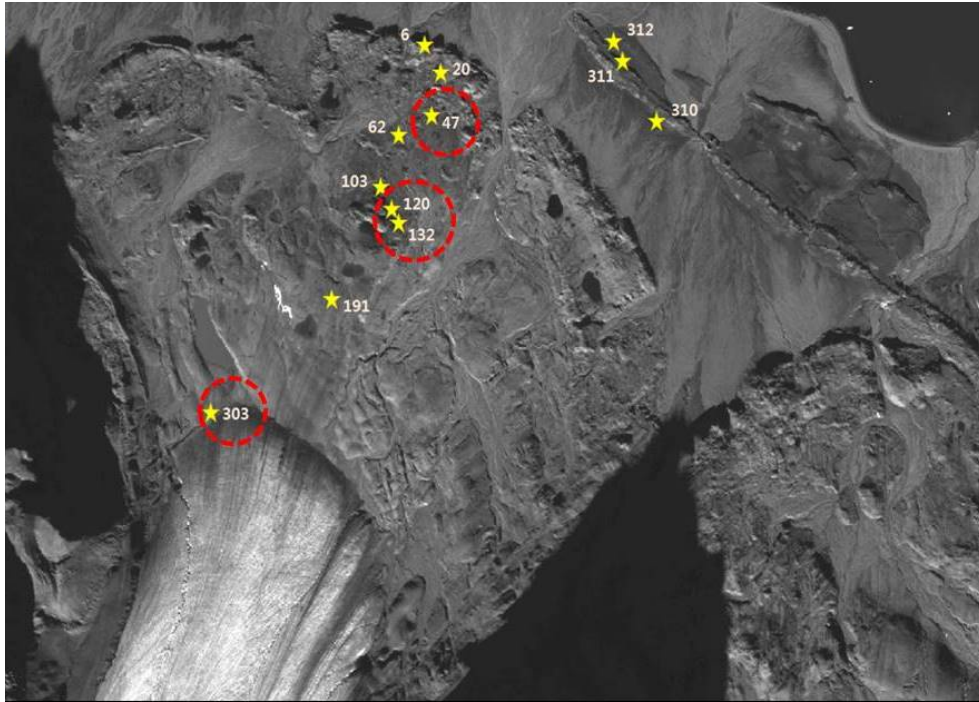

**Fig. S2.** Fragmentation mechanisms of charge-driven process (A) and charge-remote (B).

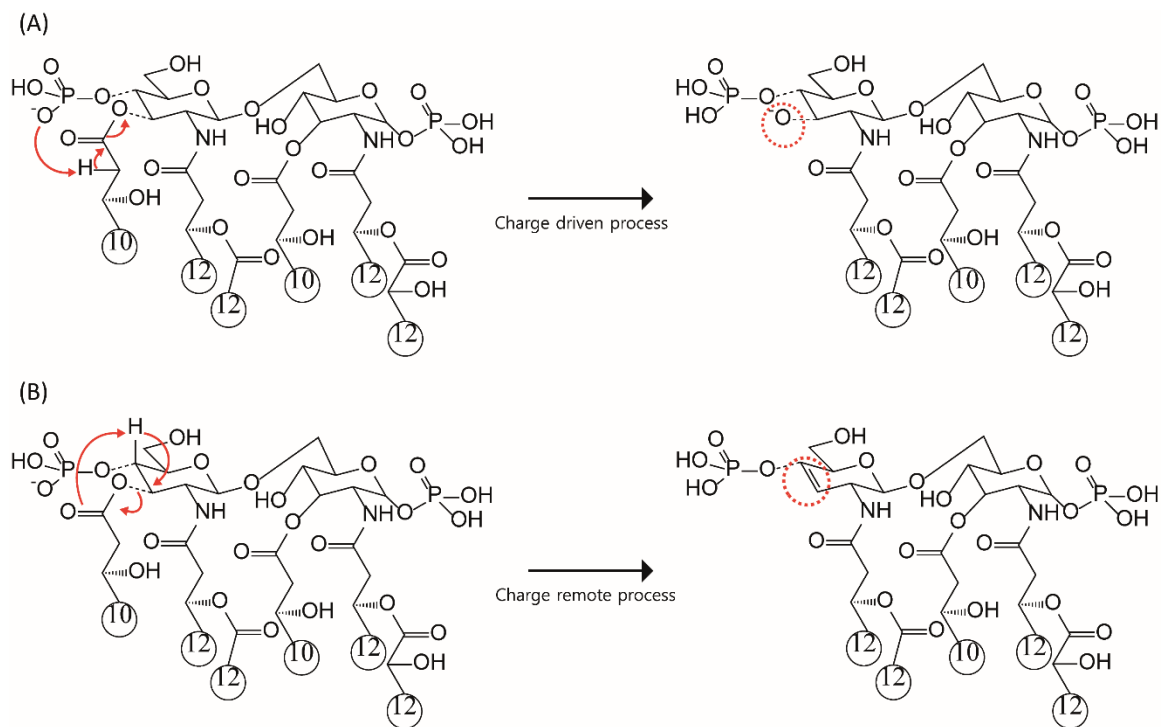

**Fig. S3.** Standard calibration curve of endotoxin, which shows a correlation between the optical density (OD) measured at 405 nm and endotoxin unit (EU) per mL., Activity of LPS in *Pseudomonas* sp. strain PAMC 28618 (12 CFU) was approximately calculated as 0.38 EU/mL (red spot).

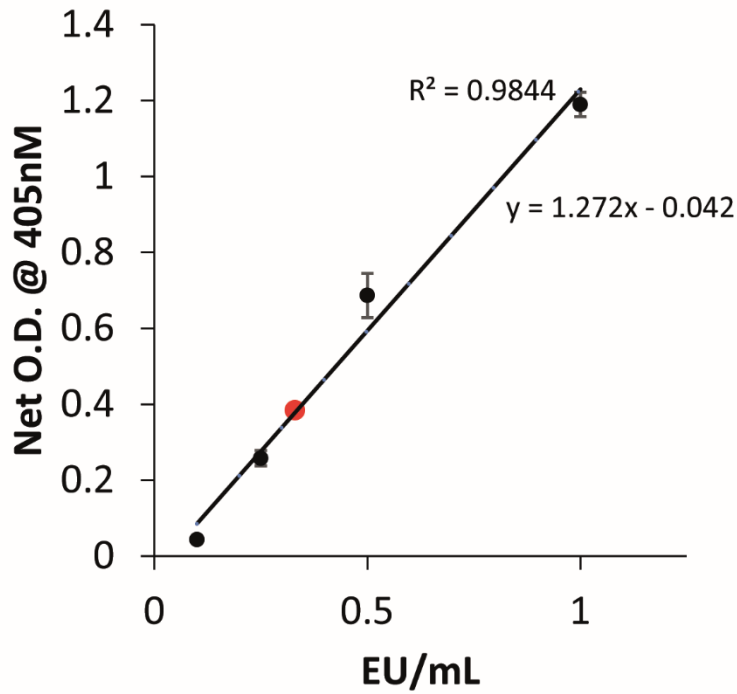



**Fig. S4.** Negative-ion MALDI-TOF MS spectrum of De-*O*-acylated lipid A from *Pseudomonas* sp. strain PAMC 28618 (A) and *Pseudomonas cichorii* (B)

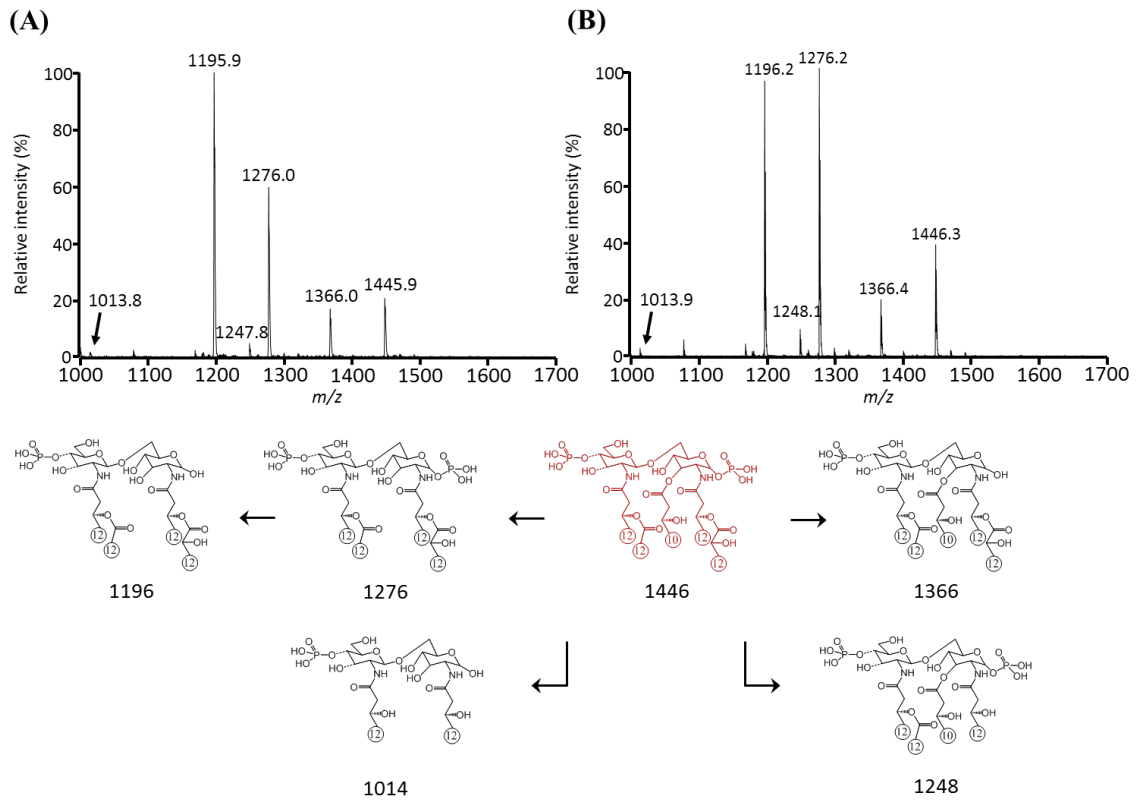

**Fig. S5.** Another pathway of MS<sup>5</sup> analysis of lipid A from *Pseudomonas* sp. strain PAMC 28618 using MALDI-QIT-TOF MS. Negative-ion MALDI-QIT-TOF MS<sup>3</sup> spectrum of *m/z* 1428.19 (A) and fragment structure (B).

(A) MS<sup>2</sup> → MS<sup>3</sup> (*m/z* 1428.19)

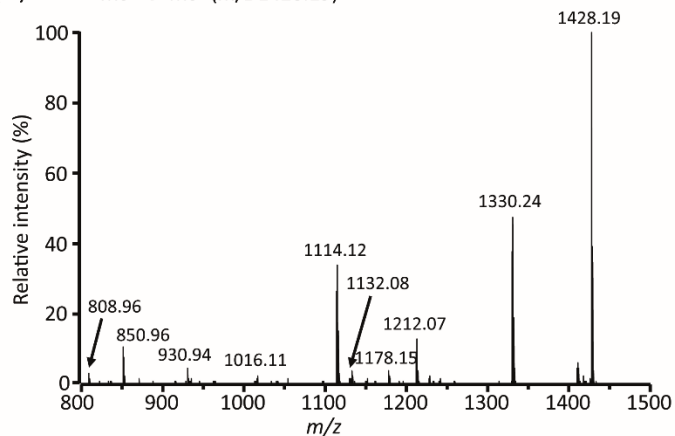

(B)

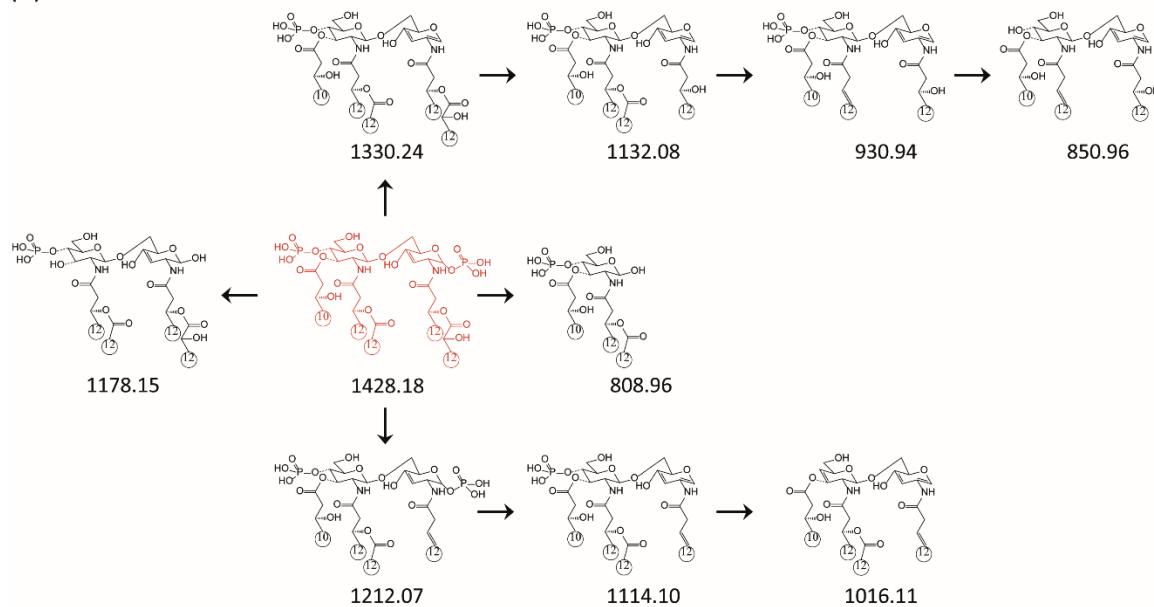

**Fig. S6.** Negative-ion MALDI-QIT-TOF MS<sup>4</sup> profile of *m/z* 1330.24 of lipid A from *Pseudomonas* sp. strain PAMC 28618 (A) and fragment structure (B).

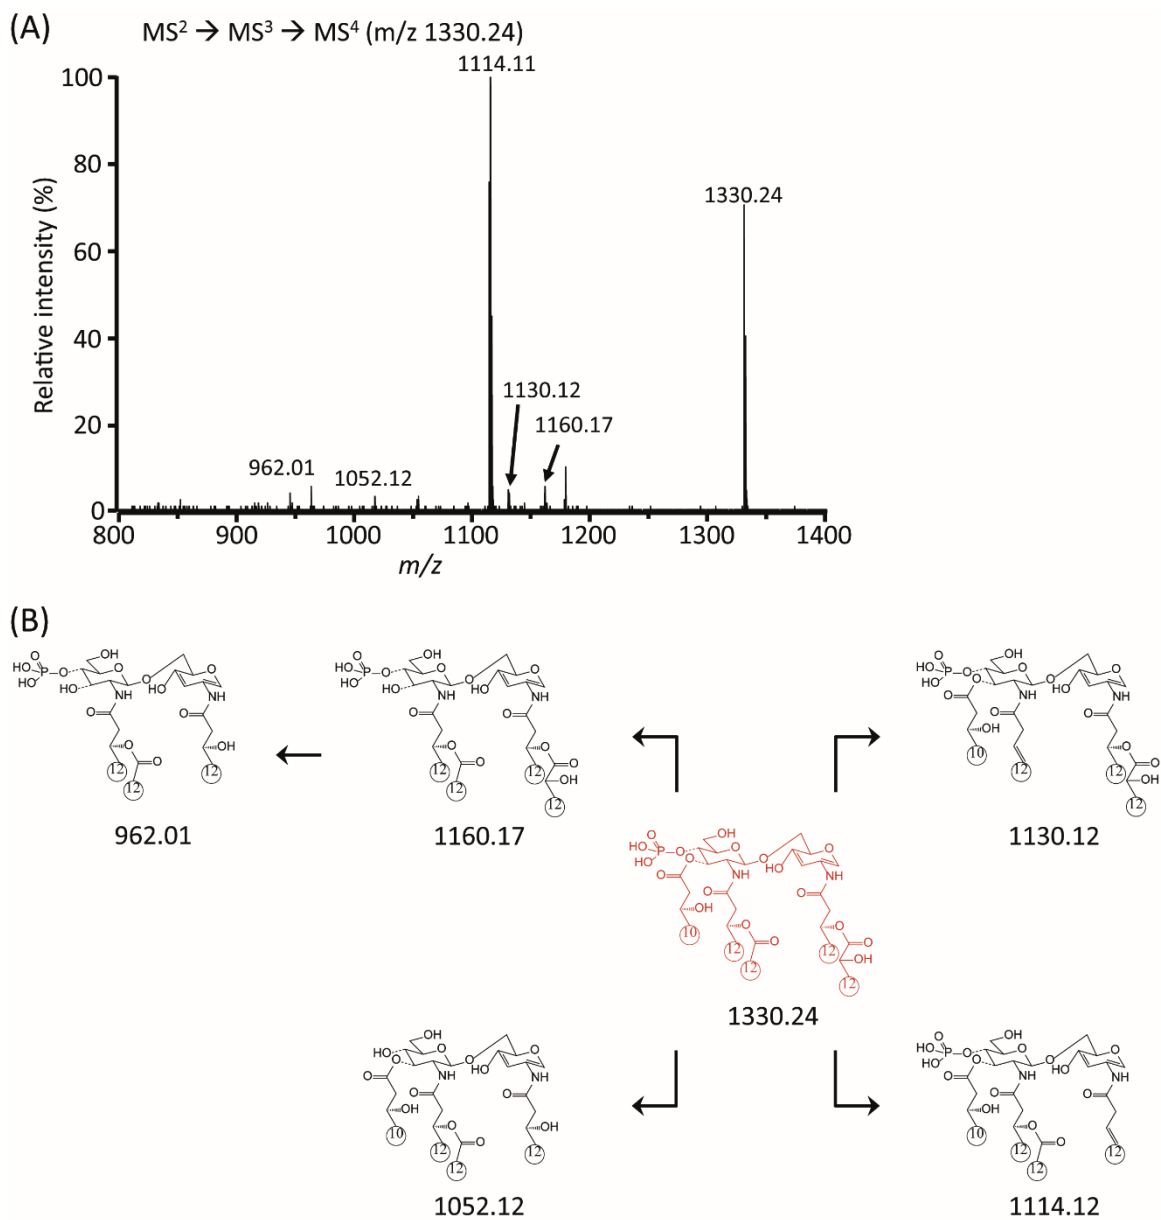

**Fig. S7.** Negative-ion MALDI-QIT-TOF MS<sup>5</sup> profile of *m/z* 1114.13 of lipid A from *Pseudomonas* sp. strain PAMC 28618 (A) and fragment structure (B).

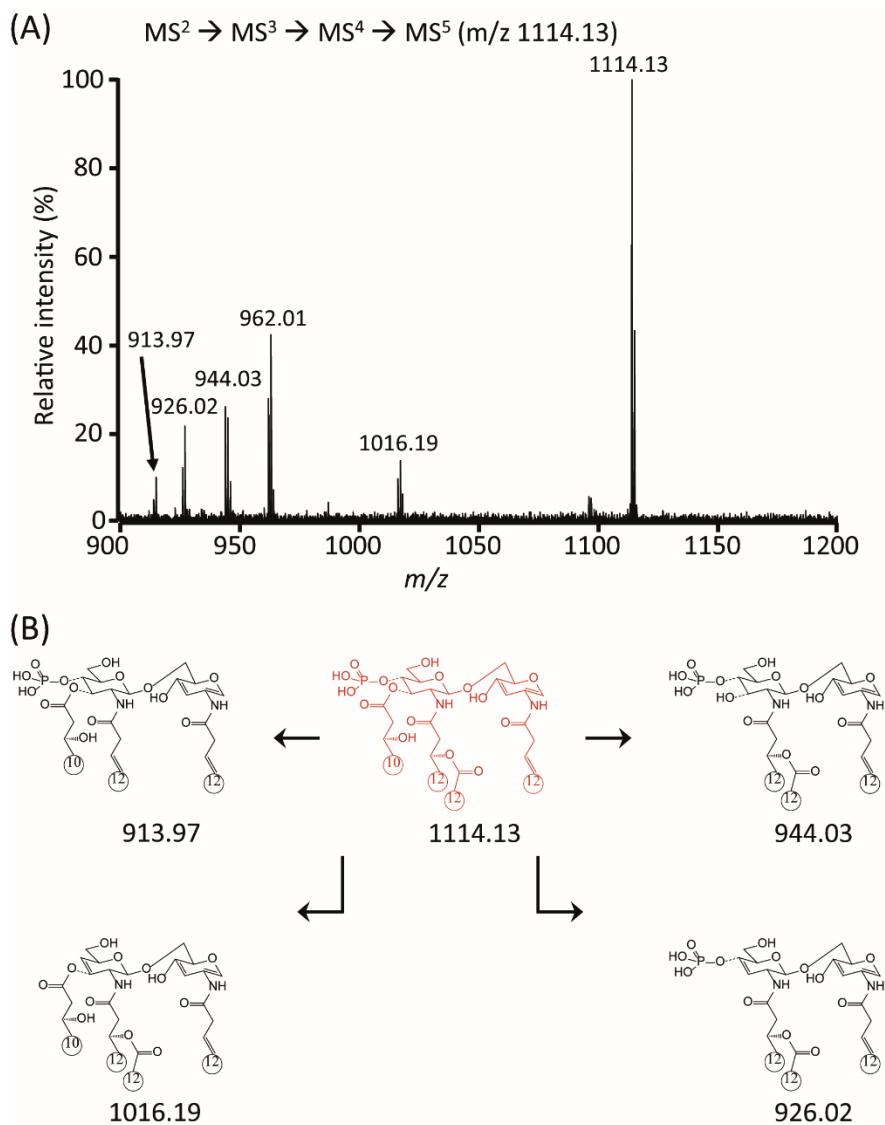

**Fig. S8.** Negative-ion MALDI-TOF MS (A) and MALDI-QIT-TOF MS (B) mass spectra of lipid A from *Pseudomonas cichorii*.

**(A)** MALDI-TOF MS

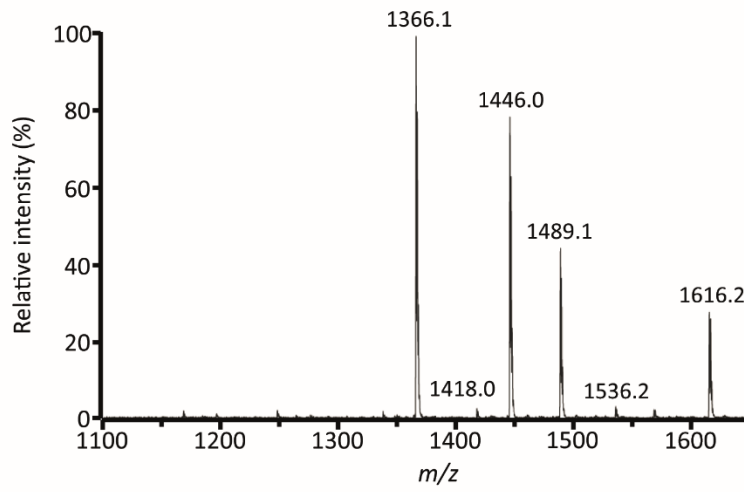

**(B)** MALDI-QIT TOF MS

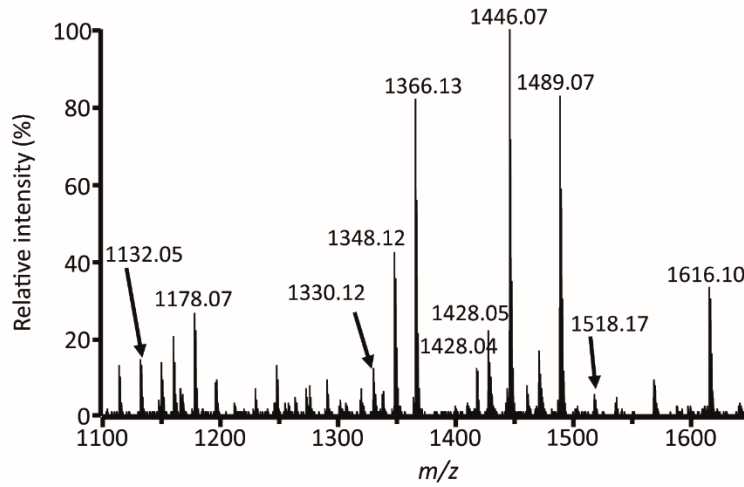

**Fig. S9.** Negative-ion MALDI-QIT-TOF MS<sup>2</sup> spectrum of *m/z* 1616.10 of lipid A from *Pseudomonas cichorii*; the structures were drawn as neutral molecules.

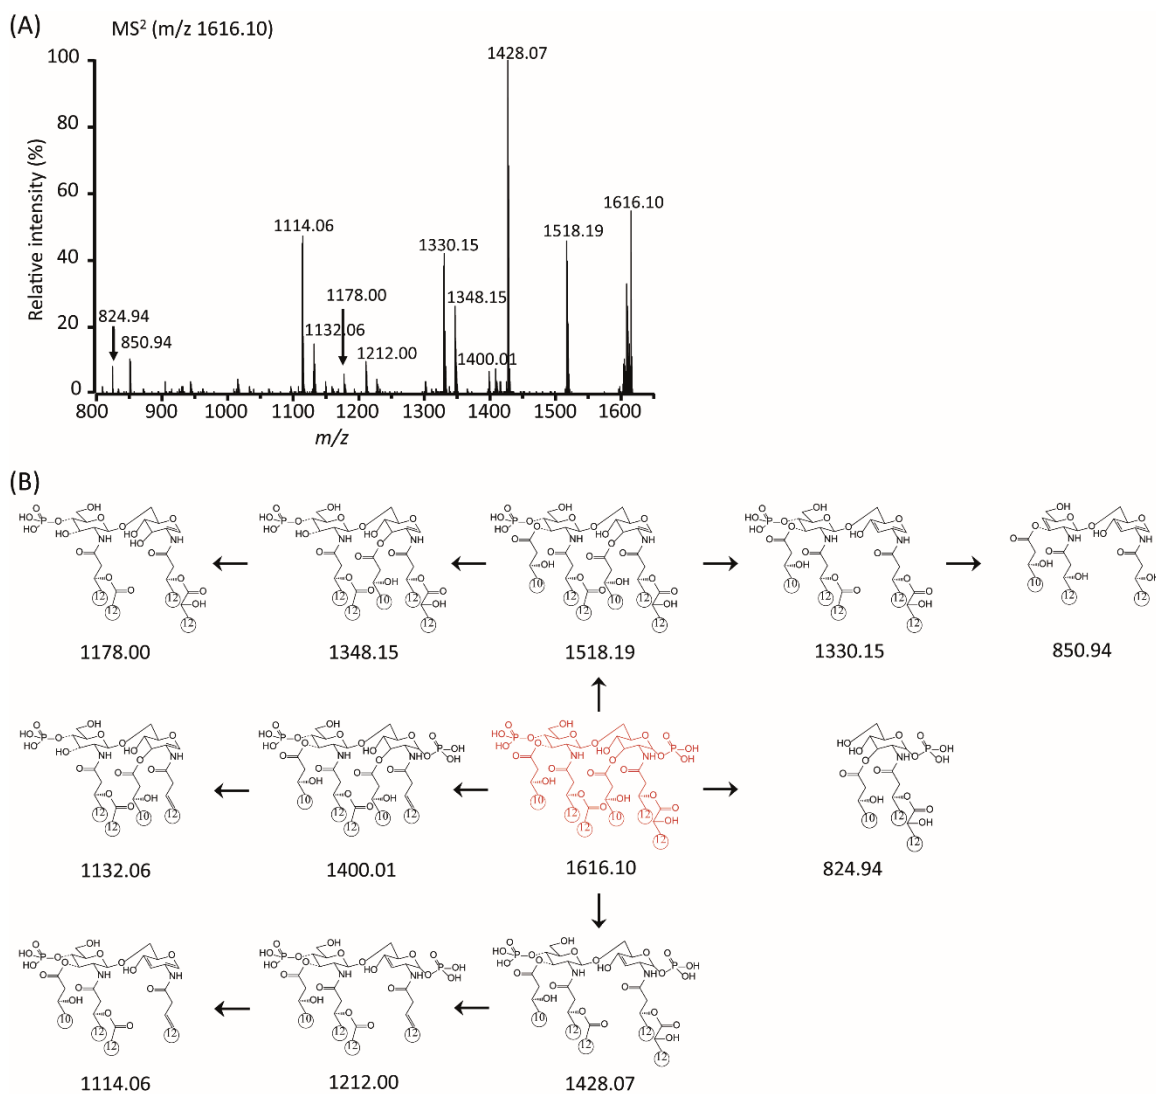

**Fig. S10.** Negative-ion MALDI-QIT-TOF MS<sup>3</sup> spectrum of *m/z* 1518.19 of lipid A from *Pseudomonas cichorii* (A) and fragment structure (B).

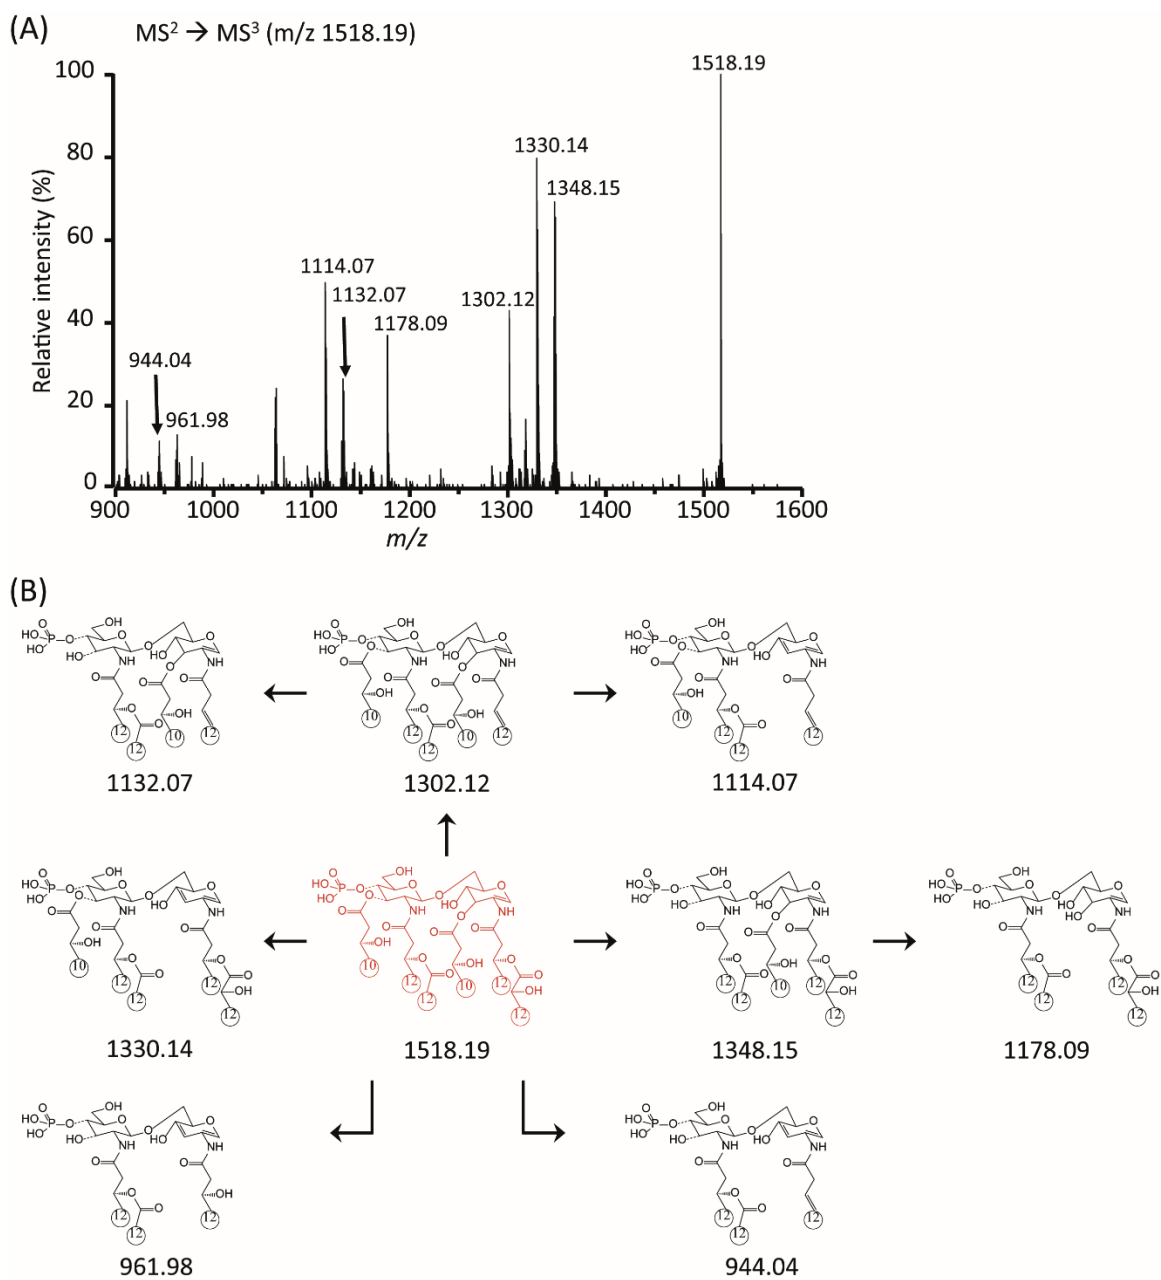

**Fig. S11.** Negative-ion MALDI-QIT-TOF MS<sup>4</sup> spectrum of *m/z* 1348.15 of lipid A from *Pseudomonas cichorii* (A) and fragment structure (B).

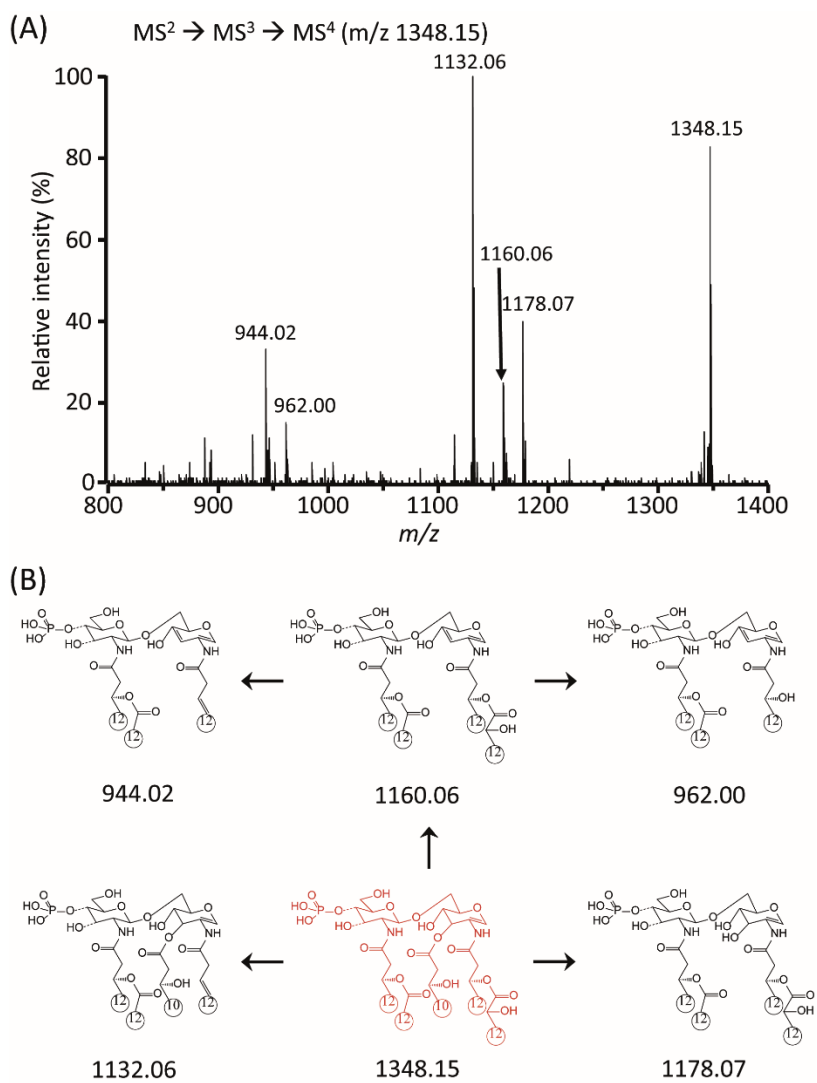

Supplement: 41598_2017_2145_MOESM1_ESM.pdf [file 41598_2017_2145_MOESM1_ESM.pdf]
